# Supplementary material for: A portable and partitioned DNA hydrogel chip for multitarget detection
Source: Royal Society of Chemistry journal article supplement (doi:10.1039/d2lc01127a), 2023-01-01
Supplement: d2lc01127a1.pdf [file d2lc01127a1.pdf]

## Supporting Information

### A portable and partitioned DNA hydrogel chip for multitarget detection

Yi Guo, <sup>#a</sup> Wenxing Li, <sup>#b</sup> Runchi Zhang, <sup>a</sup> Siyu Cao, <sup>a</sup> Xiaoli Zhu, <sup>\*b</sup> Guifang Chen, <sup>\*ac</sup>  
and Chang Feng, <sup>\*a</sup>

<sup>a</sup> Center for Molecular Recognition and Biosensing, School of Life Sciences,  
Shanghai University, Shanghai 200444, P. R. China

<sup>b</sup> Department of Clinical Laboratory Medicine, Shanghai Tenth People's Hospital of  
Tongji University, Shanghai 200072, P. R. China

<sup>c</sup> Shanghai Engineering Research Center of Organ Repair, Shanghai University,  
Shanghai 200444, P. R. China.

\*Corresponding author.

E-mail address: xiaolizhu@tongji.edu.cn (X. Zhu), gfchen@shu.edu.cn (G. Chen),  
cfeng@shu.edu.cn (C, Feng)

<sup>#</sup>Yi Guo and Wenxing Li contributed equally to this work.

**Table S1.** Sequences of DNA oligonucleotides used in this work

| oligonucleotide                         | Sequence (5'→3')                                                                                                                 |
|-----------------------------------------|----------------------------------------------------------------------------------------------------------------------------------|
| Circular DNA 1 (C1)                     | PO <sub>4</sub> -CTT CGC TCT GCA CTG CAT CGA AAA AAA ACC CAA<br>CCC GCC CTA AAA AAA ACA GAG TCA AGA GGA GTG AGT<br>AAA AAA AA    |
| Circular DNA 2 (C2)                     | PO <sub>4</sub> -CGA TGC AGT GCA GAG CGA AGA AAA AAA ACA CCC<br>AAG CAG GCA AAA AAA ACA GAG TCA AGA GGA GTG AGT<br>AAA AAA AA    |
| Circular DNA 3 (C3)                     | PO <sub>4</sub> -TCT CTA GCA GTC CCA CCC TCC AAC CAC CAA GCC<br>TCA GCT ACA CGA ATT GCC GAA CGC ACG CGA TCC GCA<br>TGT GGA AAA   |
| Circular DNA 4 (C4)                     | PO <sub>4</sub> -GAG GGT GGG ACT GCT AGA GA GCA CTC ATA TTC<br>CGA CGA CTG GCA CCG ATA AAA GAT CGC ATG TGG AAA<br>A              |
| Primer 1 (P1)                           | NH <sub>2</sub> -GCA GAG CGA AGT TTT TTT TAC TCA CTC C                                                                           |
| Primer 2 (P2)                           | GCA CTG CAT CGT TTT TTT TAC TCA CTC C                                                                                            |
| Primer 3 (P3)                           | NH <sub>2</sub> -ACT GCT AGA GAT TTT CCA CAT GCG                                                                                 |
| Primer 4 (P4)                           | GTC CCA CCC TCT TTT CCA CAT GCG                                                                                                  |
| Hairpin-ATP (H1)                        | FAM-CAC CTG <u>GGG GAG TAT TGC GGA GGA AGG</u> TTT TTT<br>TTT TTT TTT TTT TTT TTT TTT TTT TTC CAG G(BHQ)TG TT-<br>N <sub>3</sub> |
| Hairpin-IFN- $\gamma$ (H2)              | Cy3- <u>GGG GTT GGT TGT GTT GGG TGT TGT GTT</u> TTT TTT TTT<br>TTT TTT TTT TTT TTT TTT TTC A(BHQ)AC CCC-N <sub>3</sub>           |
| Hairpin-ATP (w.o.<br>aptamer)           | FAM-CAC CTG GTT TTT TTT TTT TTT TTT TTT TTT TTT<br>TTT TTT TTT TTT TTT TTT TTT TTC CAG GTG TT-N <sub>3</sub>                     |
| Hairpin-IFN- $\gamma$ (w.o.<br>aptamer) | Cy3- AAA CCC CTTTTTTTTTTTTTTTTTTTTTTT TTT TTT TTT TTT<br>TTT TTT TTT TTT TTT TTG GGG TTT-N <sub>3</sub>                          |

The underline indicates aptamer.

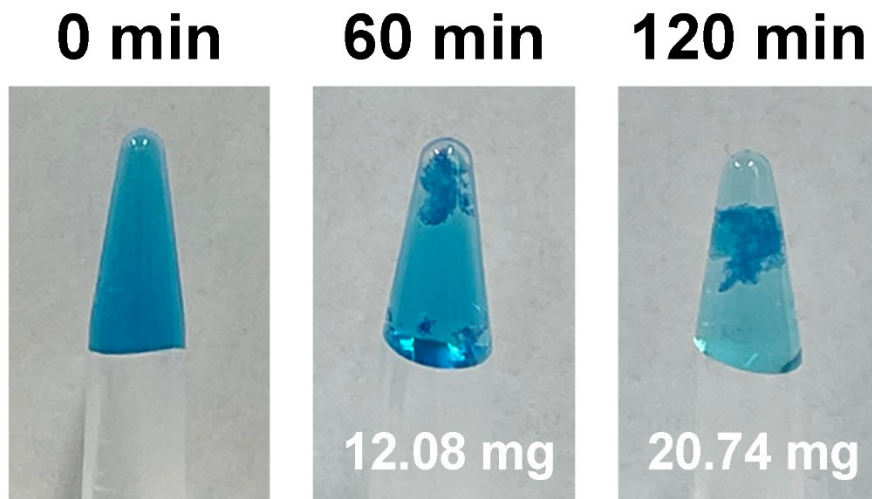

**Figure S1.** Quantitative characterization of DNA hydrogels. The DNA hydrogel (stained by methylene blue) was weighed by using an electronic balance.

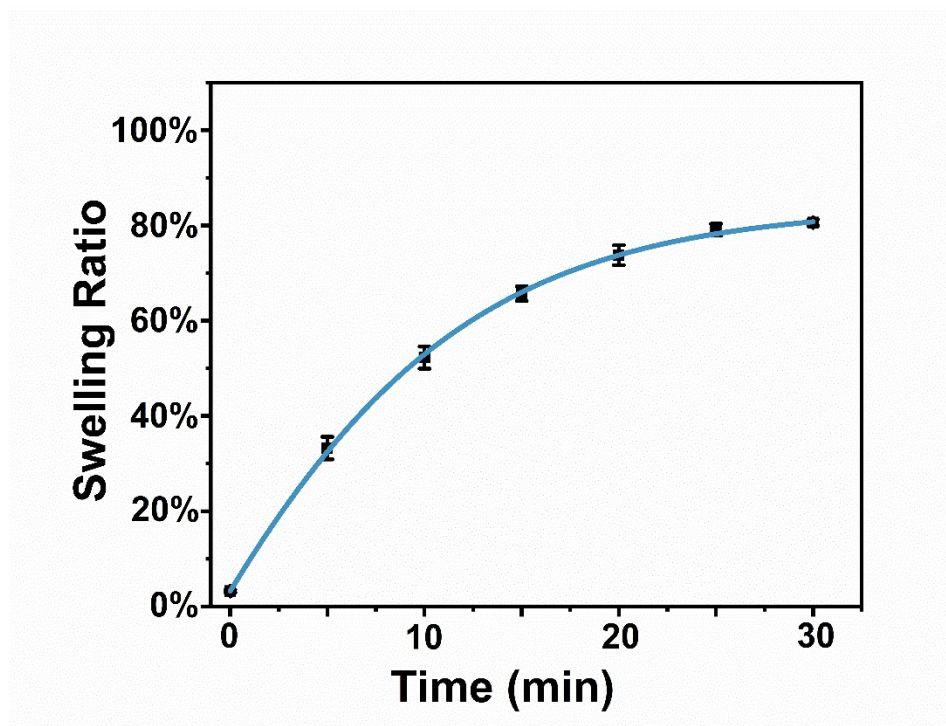

**Figure S2.** Swelling properties of DNA hydrogels. The DNA hydrogel that swelled at different times was weighed by using an electronic balance. Error bars represent standard deviations from three replicates.

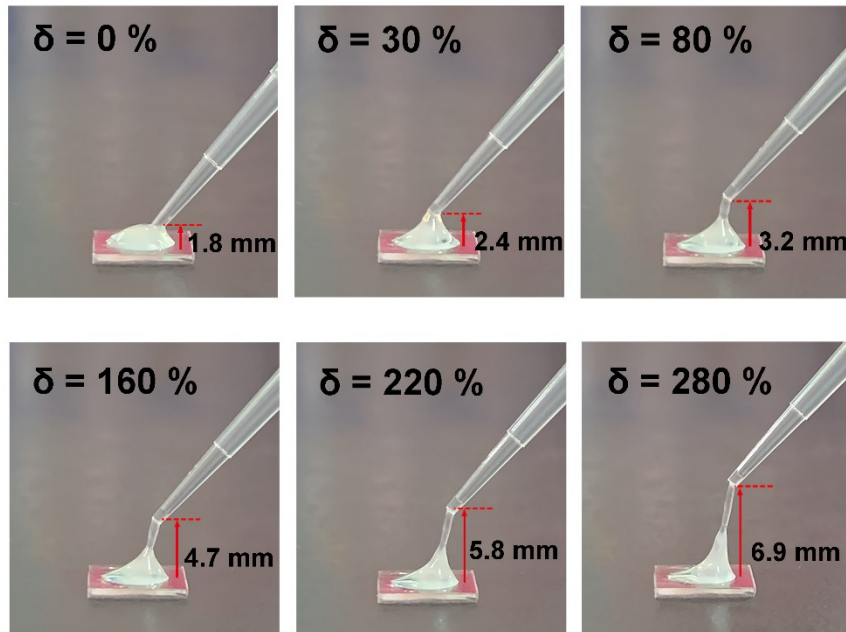

**Figure S3.** Tensile properties of hydrogels after drying and swelling.

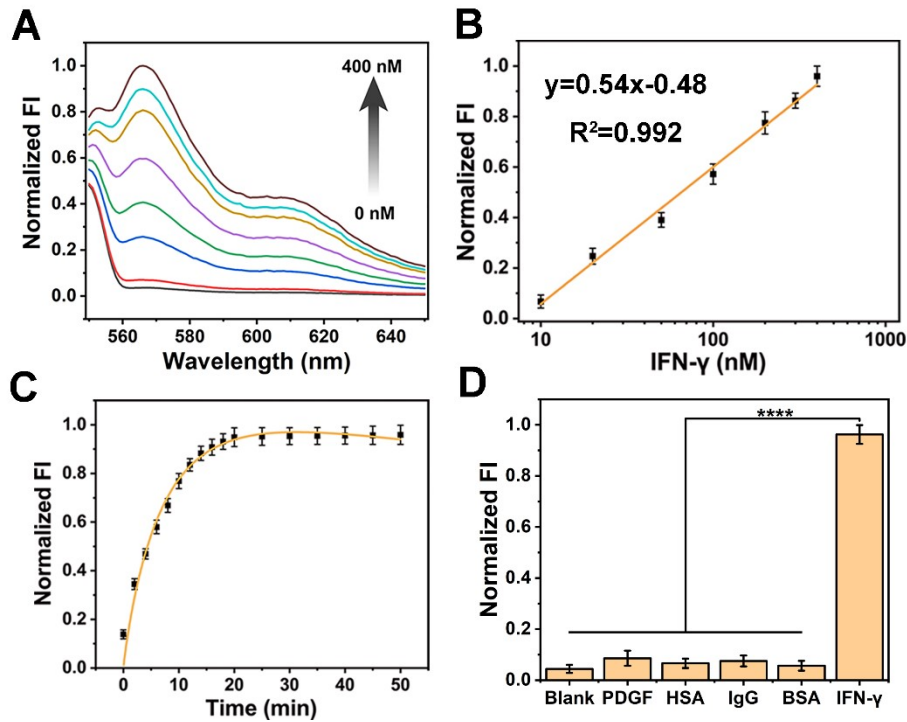

**Figure S4.** Validation of interferon- $\gamma$  detection in solution. (A) Fluorescence spectra of different concentrations of IFN- $\gamma$ . (B) Linear fitting curves of fluorescent intensity in response to IFN- $\gamma$  (10-400 nM). The linear regression equation is  $y=0.54x-0.48$  ( $R^2=0.992$ ). (C) Kinetics of fluorescent hairpins in response to IFN- $\gamma$ . (D) Fluorescence histogram to verify hairpin specificity. Statistical significance was determined by two-tailed Student's t-test; \*\*\*\* $p < 0.0001$ . Error bars represent standard deviations from three replicates.
